# Supplementary material
Source: ML conference proceedings conference paper supplement (https://proceedings.neurips.cc/paper_files/paper/2023/hash/01d64478381c33e29ed611f1719f5a37-Abstract.html)
Supplement: Supplementary file 1 [file 01d64478381c33e29ed611f1719f5a37-Supplemental-Conference.zip]

Archive with 2 entries (2 files):
- code.tar.gz
- Flow_Matching_Generation_with_Appendix.pdf
